# Supplementary material for: Large polarization and dielectric response in epitaxial SrZrO3 films
Source: Royal Society of Chemistry journal article supplement (doi:10.1039/c5cp07881d), 2016-01-01
Supplement: c5cp07881d1.pdf [file c5cp07881d1.pdf]

## Supplementary information materials

### Large polarization and dielectric response in epitaxial SrZrO<sub>3</sub> films

Hao Tian,<sup>a</sup> Ai-Jie Mao,<sup>\*a</sup> Hong Jian Zhao,<sup>b</sup> Yingqi Cui,<sup>a</sup> Hui Li,<sup>c</sup> and Xiao-Yu Kuang<sup>\*a</sup>

<sup>a</sup> *Institute of Atomic and Molecular Physics, Sichuan University, Chengdu 610065, China*

<sup>b</sup> *Laboratory of Dielectric Materials, Department of Materials Science and Engineering, Zhejiang University, Hangzhou 310027, China*

<sup>c</sup> *Laboratoire Aimé Cotton, CNRS, Université, Paris-Sud, ENS Cachan, Université Paris-Saclay, Orsay 91405, France*

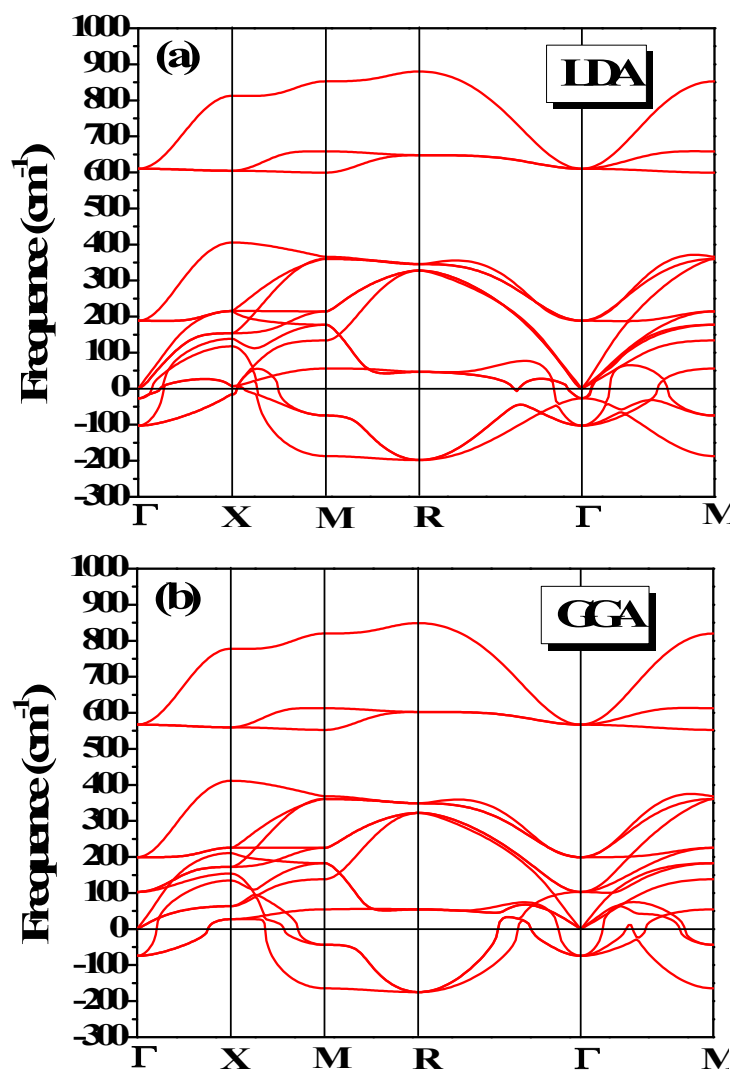

**Fig .S1.** Calculated phonon-dispersion curves of cubic SrZrO<sub>3</sub> (a) at LDA level and (b) at GGA level within the density functional perturbation theory (DFPT)<sup>1</sup> using the PHONOPY<sup>2</sup> code. The imaginary frequencies (unstable modes) are described as negative numbers.

**Table S1.** The unstable modes in cubic SrZrO<sub>3</sub>.

|                     | FE mode      | AFD mode     |              | Additional mode |             |             |
|---------------------|--------------|--------------|--------------|-----------------|-------------|-------------|
|                     | $\Gamma_4^-$ | $M_3^+$      | $R_4^+$      | $\Gamma_5^-$    | $X_5^+$     | $M_5^-$     |
| LDA                 | 102 <i>i</i> | 187 <i>i</i> | 198 <i>i</i> | 27 <i>i</i>     | 16 <i>i</i> | 74 <i>i</i> |
| GGA                 | 74 <i>i</i>  | 165 <i>i</i> | 175 <i>i</i> | –               | –           | 44 <i>i</i> |
| GGA-WC <sup>3</sup> | 87 <i>i</i>  | 167 <i>i</i> | 179 <i>i</i> | –               | –           | 50 <i>i</i> |

**Table S2.** The optimized lattice parameters  $a$ ,  $b$ ,  $c$  and reduced atomic coordinates  $x$ ,  $y$ ,  $z$  of orthorhombic  $Pbnm$  phase as obtained from LDA and GGA functionals compared with the experimental measurement.

|                         | Atoms | Wyck. | Coordinates |        |       |
|-------------------------|-------|-------|-------------|--------|-------|
|                         |       |       | $x$         | $y$    | $z$   |
| LDA                     | Sr    | 4c    | 0.009       | 0.537  | 0.25  |
| $a = 5.731 \text{ \AA}$ | Zr    | 4a    | 0           | 0      | 0     |
| $b = 5.806 \text{ \AA}$ | O1    | 4c    | -0.083      | -0.024 | 0.25  |
| $c = 8.132 \text{ \AA}$ | O2    | 8d    | 0.210       | 0.289  | 0.044 |
| GGA                     | Sr    | 4c    | 0.007       | 0.533  | 0.25  |
| $a = 5.838 \text{ \AA}$ | Zr    | 4a    | 0           | 0      | 0     |
| $b = 5.903 \text{ \AA}$ | O1    | 4c    | -0.077      | -0.021 | 0.25  |
| $c = 8.285 \text{ \AA}$ | O2    | 8d    | 0.213       | 0.287  | 0.041 |
| Expt. <sup>4</sup>      | Sr    | 4c    | 0.004       | 0.524  | 0.25  |
| $a = 5.796 \text{ \AA}$ | Zr    | 4a    | 0           | 0      | 0     |
| $b = 5.817 \text{ \AA}$ | O1    | 4c    | -0.687      | -0.013 | 0.25  |
| $c = 8.205 \text{ \AA}$ | O2    | 8d    | 0.215       | 0.284  | 0.036 |

**Table S3.** The optimized lattice parameters  $a$ ,  $b$ ,  $c$  and reduced atomic coordinates  $x$ ,  $y$ ,  $z$  of the  $P4mm$ ,  $I4/mcm$ ,  $ab-ePbnm$ ,  $c-ePbnm$ ,  $Ima2$ ,  $Pmc2_1(I)$  and  $Pmc2_1(II)$  phases in SrZrO<sub>3</sub> film for given strain. The symmetry of different equilibrium phases are determined by FINDSYM<sup>5</sup> code.

|                 | Atoms                                                                       | Wyck. | Coordinates |       |        |
|-----------------|-----------------------------------------------------------------------------|-------|-------------|-------|--------|
|                 |                                                                             |       | $x$         | $y$   | $z$    |
| <i>P4mm</i>     | $a = 3.770 \text{ \AA}$ , $b = 3.770 \text{ \AA}$ , $c = 5.123 \text{ \AA}$ |       |             |       |        |
| (-7.6%)         | $\alpha = 90^\circ$ , $\beta = 90^\circ$ , $\gamma = 90^\circ$              |       |             |       |        |
|                 | Sr                                                                          | 1a    | 0           | 0     | 0.164  |
|                 | Zr                                                                          | 1b    | 0.5         | 0.5   | 0.613  |
|                 | O1                                                                          | 1b    | 0.5         | 0.5   | -0.03  |
|                 | O2                                                                          | 2c    | 0.5         | 0     | 0.471  |
| <i>I4/mcm</i>   | $a = 5.536 \text{ \AA}$ , $b = 5.536 \text{ \AA}$ , $c = 8.460 \text{ \AA}$ |       |             |       |        |
| (-4.0%)         | $\alpha = 90^\circ$ , $\beta = 90^\circ$ , $\gamma = 90^\circ$              |       |             |       |        |
|                 | Sr                                                                          | 4b    | 0           | 0.5   | 0.25   |
|                 | Zr                                                                          | 4c    | 0           | 0     | 0      |
|                 | O1                                                                          | 8h    | 0.675       | 0.175 | 0      |
|                 | O2                                                                          | 4a    | 0           | 0     | 0.25   |
| <i>ab-ePbnm</i> | $a = 5.712 \text{ \AA}$ , $b = 8.103 \text{ \AA}$ , $c = 5.786 \text{ \AA}$ |       |             |       |        |
| (-0.7%)         | $\alpha = 90^\circ$ , $\beta = 90^\circ$ , $\gamma = 90^\circ$              |       |             |       |        |
|                 | Sr1                                                                         | 2e    | 0.009       | 0.25  | 0.038  |
|                 | Sr2                                                                         | 2e    | 0.491       | 0.25  | 0.538  |
|                 | Zr1                                                                         | 2b    | 0.5         | 0     | 0      |
|                 | Zr2                                                                         | 2c    | 0           | 0     | 0.5    |
|                 | O1                                                                          | 2e    | -0.083      | 0.25  | 0.476  |
|                 | O2                                                                          | 2e    | 0.583       | 0.25  | -0.024 |
|                 | O3                                                                          | 4f    | 0.289       | 0.456 | 0.289  |
|                 | O4                                                                          | 4f    | 0.789       | 0.544 | 0.211  |

|                             |                                                                       |    |       |        |        |
|-----------------------------|-----------------------------------------------------------------------|----|-------|--------|--------|
| <i>c-ePbnm</i>              | $a = 5.798 \text{ \AA}, b = 8.101 \text{ \AA}, c = 5.798 \text{ \AA}$ |    |       |        |        |
| (+0.5%)                     | $\alpha = 90^\circ, \beta = 90^\circ, \gamma = 90^\circ$              |    |       |        |        |
|                             | Sr                                                                    | 4c | 0.465 | 0.25   | 0.008  |
|                             | Zr                                                                    | 4a | 0     | 0      | 0      |
|                             | O1                                                                    | 4c | 0.023 | 0.25   | -0.085 |
|                             | O2                                                                    | 8d | 0.786 | -0.045 | 0.714  |
| <i>Ima2</i>                 | $a = 7.885 \text{ \AA}, b = 6.028 \text{ \AA}, c = 6.028 \text{ \AA}$ |    |       |        |        |
| (+4.5%)                     | $\alpha = 90^\circ, \beta = 90^\circ, \gamma = 90^\circ$              |    |       |        |        |
|                             | Sr                                                                    | 4b | 0.25  | 0.492  | 0.731  |
|                             | Zr                                                                    | 4a | 0     | 0      | 0.745  |
|                             | O1                                                                    | 8c | 0.454 | 0.255  | 0.009  |
|                             | O2                                                                    | 4b | 0.25  | 0.590  | 0.293  |
| <i>Pmc2<sub>1</sub>(I)</i>  | $a = 7.885 \text{ \AA}, b = 6.028 \text{ \AA}, c = 6.028 \text{ \AA}$ |    |       |        |        |
| (+4.5%)                     | $\alpha = 90^\circ, \beta = 90^\circ, \gamma = 90^\circ$              |    |       |        |        |
|                             | Sr1                                                                   | 2b | 0.5   | 0.742  | 0.030  |
|                             | Sr2                                                                   | 2a | 0     | 0.758  | 0.028  |
|                             | Zr                                                                    | 4c | 0.25  | 0.25   | 0.014  |
|                             | O1                                                                    | 2b | 0.5   | 0.840  | 0.466  |
|                             | O2                                                                    | 2a | 0     | 0.660  | 0.467  |
|                             | O3                                                                    | 4c | 0.704 | 0.494  | 0.251  |
|                             | O4                                                                    | 4c | 0.796 | -0.004 | 0.749  |
| <i>Pmc2<sub>1</sub>(II)</i> | $a = 3.792 \text{ \AA}, b = 6.114 \text{ \AA}, c = 6.114 \text{ \AA}$ |    |       |        |        |
| (+6.0%)                     | $\alpha = 90^\circ, \beta = 90^\circ, \gamma = 90^\circ$              |    |       |        |        |
|                             | Sr                                                                    | 2b | 0.5   | 0.179  | 0.058  |
|                             | Zr                                                                    | 2a | 0     | 0.717  | 0.025  |
|                             | O1                                                                    | 2b | 0.5   | 0.224  | 0.462  |
|                             | O2                                                                    | 2a | 0     | -0.060 | 0.273  |
|                             | O3                                                                    | 2a | 0     | 0.567  | 0.692  |

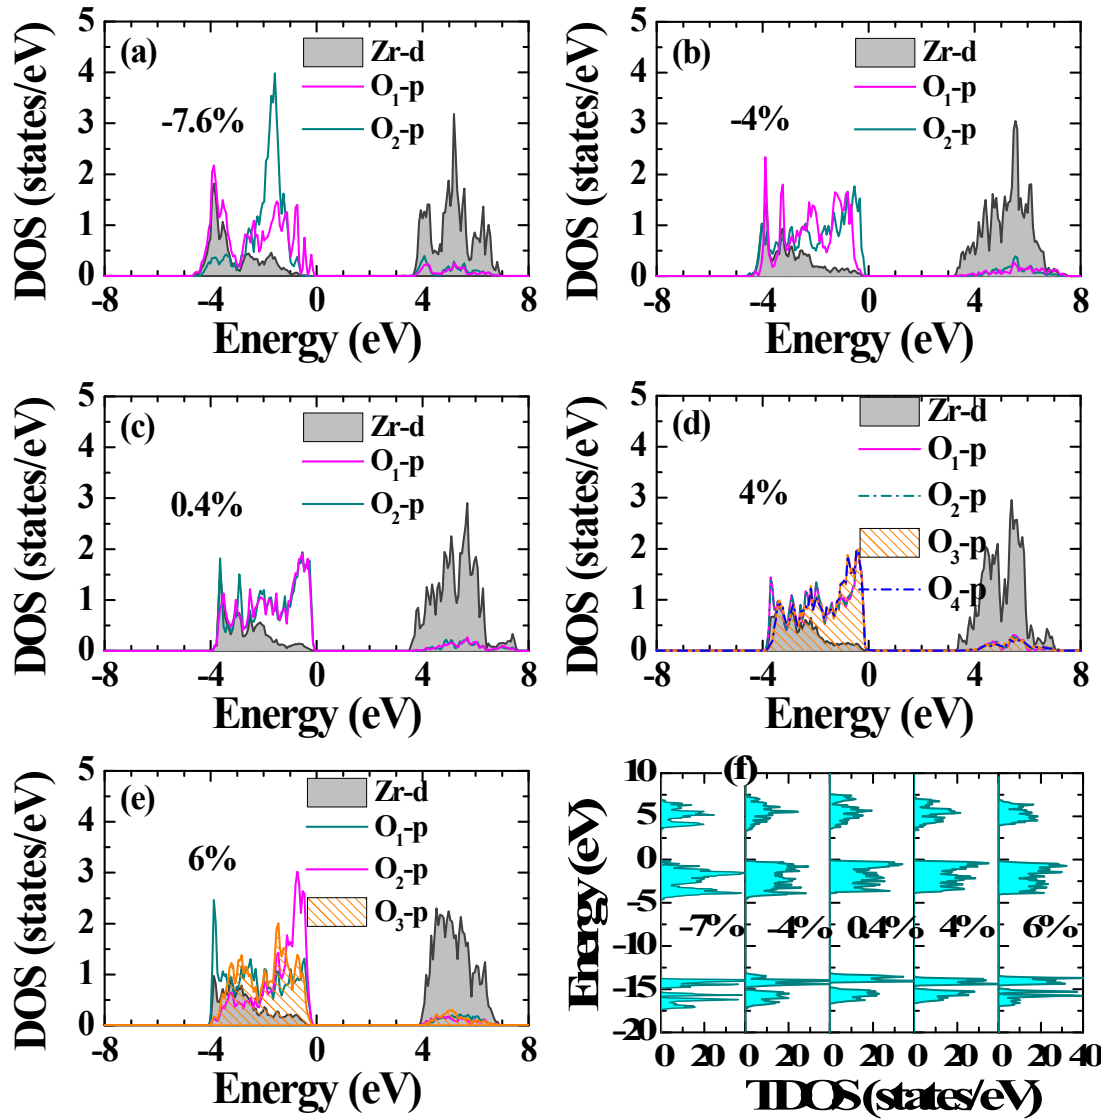

Fig .S2. The projected (a-e) and total (f) density of states for SZO films with different misfit strain.

According to Fig. 5 and Fig .S2, the total density of states (TDOS) and projected density of states (PDOS) in paraelectric phases clearly show the strong hybridization between Zr d and O p orbitals, which are mainly located from -5 eV to 0 eV (that is, the Fermi level, which is set to zero). In detail, the *c-ePbnm* and *I4/mcm* phases exhibit the energy overlap and hybridization peaks between Zr d and O p orbitals (not only in-plane O<sub>1</sub> p orbital but also out-of-plane O<sub>2</sub> p orbital). However, the *P4mm* phase possesses stronger hybridization between Zr d and in-plane O<sub>1</sub> p orbitals (especially at -4 eV), while the orbital hybridization between Zr d and out-of-plane O<sub>2</sub> p is mainly shifted to about -1.5 eV, which implies highly covalent interaction

between Zr d and in-plane O<sub>1</sub> p orbitals and corresponds to the complete vanishing oxygen octahedral tilting as well as the relative z-displacements of these two atoms. As for the tensile strain, the hybridization between Zr d and O p orbitals is also enhanced. Due to the lower symmetry induced by in-plane strain, more hybridization peaks emerge between different O p and Zr d orbitals in the distinct *Pmc2*<sub>1</sub> phases. According to Table 1 and Fig .S2, the stronger hybridization also corresponds to the enhanced polarization with the increase of misfit strain. Practically, the major hybridization peaks are located from -3.5 eV to -2 eV at 4.5% tensile strain, while a stronger hybridization peak emerges at -4 eV and there are relatively obvious hybridization peaks at the range between -2 eV and 0 eV at 6% tensile strain. In summary, the DOS demonstrates that the hybridization between Zr d and O p orbitals becomes stronger in the presence of strain, which corresponds to the enhanced polarization with the increase of misfit strain.



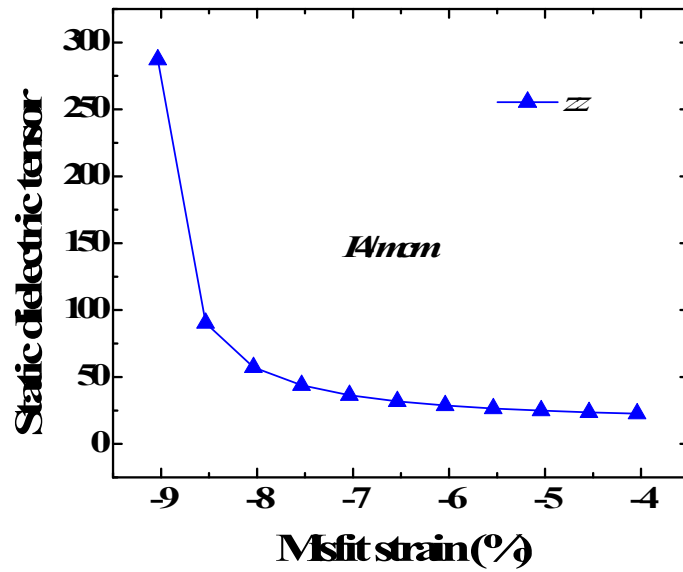

**Fig .S3.** Calculated out-of-plane component of static dielectric tensor  $\epsilon^0_{zz}$  in the *I4/mcm* phase, as a function of compressive strain.

### References

- 1 M. Gajdoš, K. Hummer, G. Kresse, J. Furthmüller and F. Bechstedt, *Phys. Rev. B*, 2006, **73**, 045112.
- 2 A. Togo, F. Oba and I. Tanaka, *Phys. Rev. B*, 2008, **78**, 134106.
- 3 S. Amisi, E. Bousquet, K. Katcho and P. Ghosez, *Phys. Rev. B*, 2012, **85**, 064112.
- 4 B. J. Kennedy, C. J. Howard and B. C. Chakoumakos, *Phys. Rev. B*, 1999, **59**, 4023.
- 5 H. T. Stokes and D. M. Hatch, *J. Appl. Crystallogr.*, 2005, **38**, 237–238.
